# Supplementary material for: Omics approaches to probe markers of disease resistance in animal sciences
Source: Royal Society of Chemistry journal article supplement (doi:10.1039/c6mb00220j), 2016-05-05
Supplement: c6mb00220j1.pdf [file c6mb00220j1.pdf]

| Omics | Method                          | Target            | Animal  | Disease                | Ref |
|-------|---------------------------------|-------------------|---------|------------------------|-----|
| G     | QTL                             | DNA               | Trout   | Bacterial water        | 5   |
| G     | GWAS                            | DNA               | Cow     | Paratuberculosis       | 9   |
| G     | GWAS                            | DNA               | Human   | Alzheimer              | 10  |
| T     | Microarray<br>qRT-PCR           | mRNA              | Chicken | Infectious bursal      | 15  |
| T     | Microarray<br>qRT-PCR           | mRNA              | Salmon  | Alphavirus<br>Reovirus | 16  |
| T     | SAGE                            | mRNA              | Deer    | Paratuberculosis       | 17  |
| T     | Microarray<br>qRT-PCR           | miRNA             | Dog     | Cardiomyopathy         | 22  |
| T     | qRT-PCR                         | miRNA             | Human   | Osteoporosis           | 23  |
| T     | RNAseq                          | miRNA             | Cow     | Paratuberculosis       | 24  |
| P     | LC/MS                           | Proteins          | Salmon  | Amoebic gill           | 27  |
| P     | Electrophoresis<br>LC/MS        | Proteins          | Cow     | Mastitis               | 28  |
| P     | 2D-DIGE                         | Proteins          | Cow     | Paratuberculosis       | 29  |
| M     | GS/MS                           | Metabolites       | Dog     | Inflammatory bowel     | 32  |
| M     | HPLC                            | Metabolites       | Cow     | Hepatic lipidosis      | 33  |
| E     | Methylation assay               | DNA               | Human   | Anaplasmosis           | 35  |
| G+T+I | GWAS/RNAseq<br><i>In silico</i> | DNA/mRNA          | Pigs    | Obesity                | 39  |
| G+T+P | DNaseq/RNAseq<br>LC/MS          | DNA/mRNA/Proteins | Rat     | Hypertension           | 40  |

### Used omics publications in animal diseases

This table gives the references used to illustrate omics applied to animal disease. The first column indicates what type of omics was used: Genomics (G), Transcriptomics (T), Proteomics (P), Metabolomics (M), Epigenomics (E), or a combination. Methodology was used is indicated in the second column, type of targeted molecule(s) in the third, animal studied in the fourth, disease studied in the fifth, and the reference in the sixth. QTL=Quantitative Trait Loci / GWAS=Genome Wide Association Study / GS=Gas Chromatography / LC=Liquid Chromatography / MS=Mass Spectrometry / HPLC=High Pressure Liquid Chromatography. References illustrate the omics global utilization for every animal, type of diseases and targeted molecule.

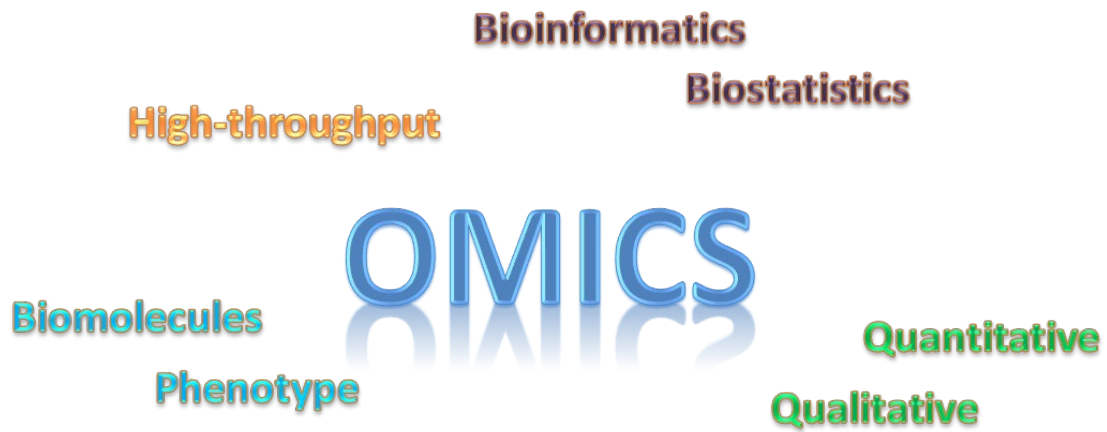

### **Omics in 7 words**

Omics aims to study relationships between phenotypes and biomolecules (DNA, RNA, Proteins, and Metabolites). Omics is a collection of high-throughput quantitative and qualitative techniques, using bioinformatics and biostatistics to analyze collected data.
